# Supplementary material for: A comparison of digestive strategies for fishes with different feeding habits: Digestive enzyme activities, intestinal morphology, and gut microbiota
Source: PubMed Central journal article supplement (PMC10495811; doi:10.1002/ece3.10499), 2023-09-12

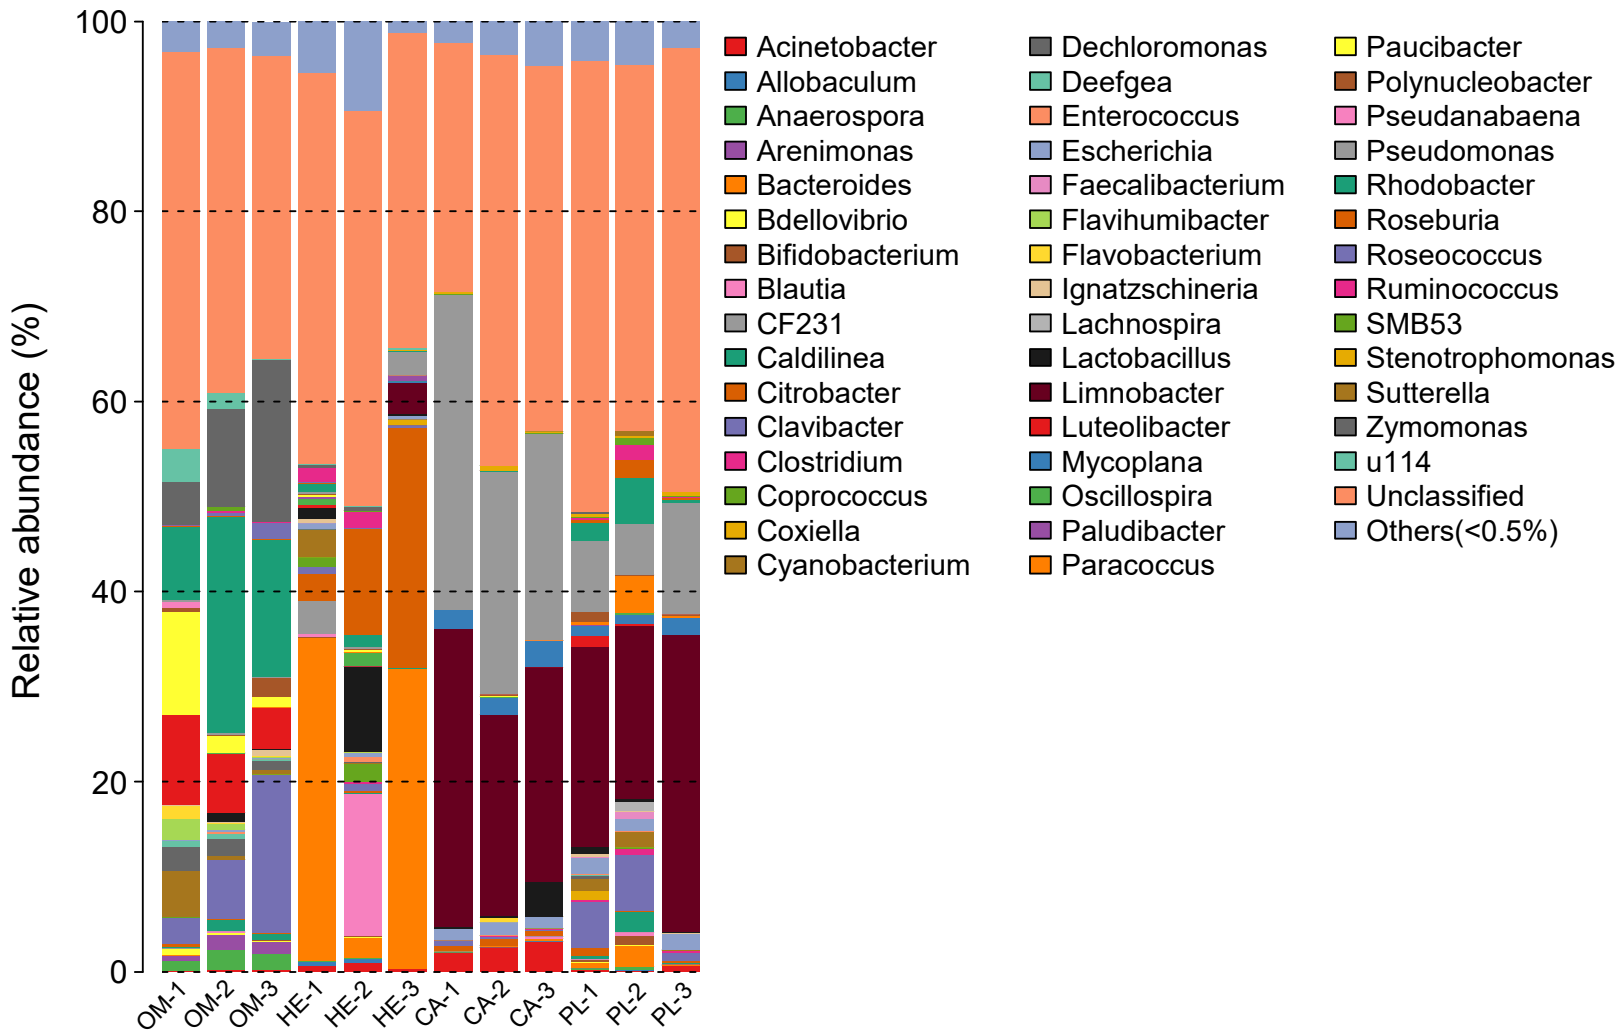

Supplement: ECE3-13-e10499-s003.pdf [file ECE3-13-e10499-s003.pdf]
